# Supplementary material
Source: PubMed Central journal article supplement (PMC8543705)
Supplement: NIHMS1035379-supplement-Suppl_Table_2.pdf [file NIHMS1035379-supplement-Suppl_Table_2.pdf]

Supplementary table 2: Identified and significantly altered metabolites between ischemic (PI) and contralateral (CL) side brain samples (arranged based on p-value)

| Compound                                 | Control CL |         | Control PI |         | HX600 CL |         | HX600 PI |         | Control CL vs Control PI |           | HX600 PI vs Control PI |           |
|------------------------------------------|------------|---------|------------|---------|----------|---------|----------|---------|--------------------------|-----------|------------------------|-----------|
|                                          | Mean       | SD      | Mean       | SD      | Mean     | SD      | Mean     | SD      | p-value                  | Cohen's d | p-value                | Cohen's d |
| N-acetylaspartate                        | 14278726   | 609629  | 11237016   | 667075  | 13348316 | 1367266 | 12124516 | 893748  | 0.00002                  | -4.76     | 0.10552                | 1.14      |
| Adenosine 5'-monophosphate (AMP)         | 4798288    | 367662  | 3306735    | 282481  | 4608484  | 227732  | 3614380  | 638265  | 0.00003                  | -4.59     | 0.34759                | 0.67      |
| 5-hydroxyindoleacetic acid (5-HIAA)      | 61459      | 7390    | 94763      | 8981    | 59278    | 6547    | 85221    | 21547   | 0.00008                  | 4.07      | 0.38221                | -0.63     |
| Ethanolamine phosphate                   | 564902     | 18791   | 436903     | 45574   | 512200   | 39375   | 447333   | 52680   | 0.00017                  | -3.98     | 0.74469                | 0.21      |
| Acylcarnitine 22:6                       | 10236      | 2031    | 321082     | 121339  | 10151    | 2715    | 218363   | 119333  | 0.00019                  | 5.04      | 0.20690                | -0.85     |
| Adenosine                                | 7903693    | 450127  | 6349527    | 412867  | 6772215  | 607548  | 5799205  | 1118279 | 0.00020                  | -3.60     | 0.32625                | -0.72     |
| LysoPC 22:6                              | 2052559    | 645084  | 4675535    | 925141  | 1842462  | 609804  | 3669387  | 985099  | 0.00040                  | 3.34      | 0.12693                | -1.05     |
| Guanosine 5'-monophosphate               | 230310     | 18418   | 170666     | 18465   | 214975   | 10137   | 172428   | 25706   | 0.00045                  | -3.23     | 0.90339                | 0.08      |
| Adenine                                  | 1469775    | 158028  | 1029084    | 129650  | 1293169  | 193498  | 987959   | 296703  | 0.00070                  | -3.06     | 0.78220                | -0.19     |
| LysoPC 20:4                              | 1596678    | 376136  | 2779420    | 446648  | 1489946  | 322241  | 2569271  | 595159  | 0.00109                  | 2.87      | 0.54188                | -0.40     |
| Acylcarnitine 6:0                        | 115448     | 18751   | 154701     | 5642    | 105087   | 35482   | 121653   | 42426   | 0.00117                  | 3.22      | 0.11495                | -1.38     |
| LysoPC 16:1                              | 77782      | 15412   | 138040     | 26975   | 74938    | 18970   | 104412   | 18007   | 0.00147                  | 2.84      | 0.04288                | -1.50     |
| Threonine                                | 134477     | 95534   | 421593     | 113518  | 65367    | 40796   | 356599   | 201957  | 0.00150                  | 2.75      | 0.54452                | -0.41     |
| Lyso PC 14:0                             | 79215      | 17893   | 141595     | 27678   | 74464    | 12680   | 97993    | 15600   | 0.00174                  | 2.74      | 0.01187                | -2.01     |
| LysoPC 18:1                              | 8826249    | 2248645 | 17080658   | 3782499 | 8951671  | 2264456 | 12289569 | 1869302 | 0.00184                  | 2.74      | 0.02941                | -1.70     |
| Acylcarnitine 18:2                       | 215236     | 75950   | 592979     | 193337  | 209159   | 55782   | 356055   | 120443  | 0.00226                  | 2.81      | 0.04235                | -1.51     |
| 5-Aminosalicylic acid                    | 1018226    | 18273   | 979249     | 12005   | 1038030  | 9303    | 979210   | 26293   | 0.00258                  | -2.57     | 0.99764                | 0.00      |
| Oxidized glutathione                     | 670270     | 137680  | 358673     | 109736  | 543678   | 148433  | 481387   | 66296   | 0.00270                  | -2.52     | 0.05801                | 1.39      |
| Acylcarnitine 4:0                        | 1161278    | 210482  | 1744276    | 253817  | 1051130  | 237121  | 1323595  | 358567  | 0.00271                  | 2.51      | 0.05791                | -1.37     |
| Citrulline                               | 516477     | 67054   | 723645     | 105366  | 470320   | 61603   | 675246   | 167336  | 0.00405                  | 2.40      | 0.59619                | -0.35     |
| Acylcarnitine 10:0                       | 52686      | 11709   | 79248      | 10981   | 46900    | 6835    | 55746    | 9386    | 0.00411                  | 2.34      | 0.00455                | -2.31     |
| Phosphocholine                           | 16269720   | 1781938 | 12973953   | 976629  | 14913441 | 2178677 | 13823097 | 3115578 | 0.00464                  | -2.39     | 0.57376                | 0.42      |
| LysoPC 22:4                              | 106399     | 22459   | 248475     | 87042   | 101331   | 33619   | 182283   | 61989   | 0.00541                  | 2.59      | 0.19614                | -0.89     |
| LysoPC 16:0                              | 15731716   | 4197768 | 31050741   | 8750763 | 17147177 | 5272621 | 19225068 | 4371327 | 0.00545                  | 2.37      | 0.02219                | -1.80     |
| LysoPE 22:5                              | 63367      | 13202   | 135674     | 44018   | 60674    | 25320   | 98549    | 22129   | 0.00555                  | 2.53      | 0.12290                | -1.12     |
| Acylcarnitine 18:0                       | 175660     | 101001  | 863831     | 427921  | 193372   | 49950   | 362041   | 96166   | 0.00573                  | 2.60      | 0.02846                | -1.91     |
| Glutathione                              | 6570689    | 463001  | 5797864    | 182475  | 6529833  | 395716  | 5589184  | 897754  | 0.00600                  | -2.39     | 0.62156                | -0.39     |
| Trigonelline                             | 215336     | 32544   | 444938     | 145624  | 192033   | 48063   | 461032   | 189226  | 0.00632                  | 2.58      | 0.88320                | 0.10      |
| Acylcarnitine 18:3                       | 60814      | 19192   | 103784     | 20749   | 46739    | 11456   | 70671    | 17580   | 0.00678                  | 2.15      | 0.02146                | -1.73     |
| Palmitoylethanolamide (PEA)              | 114139     | 38123   | 6518554    | 4350473 | 89289    | 31979   | 2945785  | 2466617 | 0.00813                  | 2.92      | 0.14125                | -1.05     |
| LysoPC 18:2                              | 393517     | 95779   | 579232     | 84497   | 375880   | 69650   | 484925   | 60479   | 0.00870                  | 2.06      | 0.06988                | -1.30     |
| Acetylcarnitine                          | 26658686   | 2359056 | 31158289   | 2014859 | 25977798 | 3885495 | 29372344 | 3999121 | 0.00882                  | 2.06      | 0.39345                | -0.59     |
| 5'-Methylthioadenosine                   | 1387051    | 132676  | 1602449    | 71918   | 1457997  | 113940  | 1457895  | 267270  | 0.00963                  | 2.11      | 0.26996                | -0.85     |
| N-oleoylethanolamine (OEA)               | 137818     | 43519   | 2904144    | 1937988 | 122338   | 35215   | 1632989  | 1022278 | 0.00964                  | 2.79      | 0.22367                | -0.86     |
| 4-(diaminomethylideneamino)butanoic acid | 214722     | 24396   | 250945     | 7158    | 219256   | 27155   | 233241   | 44231   | 0.00972                  | 2.30      | 0.39770                | -0.69     |
| Glycine betaine                          | 3834837    | 959071  | 6846618    | 1939411 | 2913380  | 1184349 | 7507410  | 2526164 | 0.01101                  | 2.08      | 0.65262                | 0.30      |
| L-a-Lysophosphatidylserine               | 159107     | 31139   | 299349     | 97782   | 162845   | 43825   | 195455   | 73206   | 0.01213                  | 2.18      | 0.08635                | -1.22     |
| LysoPE 22:6                              | 2284058    | 516505  | 3832939    | 1011993 | 2081926  | 905968  | 3493359  | 1142687 | 0.01229                  | 2.03      | 0.62962                | -0.32     |
| Acylcarnitine 16:3                       | 111087     | 27274   | 184999     | 46879   | 102676   | 12869   | 107380   | 19549   | 0.01231                  | 1.99      | 0.00658                | -2.34     |
| Taurine                                  | 3368610    | 166828  | 2959221    | 261311  | 3155695  | 188409  | 2952059  | 319384  | 0.01447                  | -1.91     | 0.96981                | -0.02     |
| Aspartic acid                            | 1130281    | 89701   | 967719     | 85576   | 1022514  | 68690   | 947966   | 70645   | 0.01499                  | -1.85     | 0.69897                | -0.25     |
| Docosahexaenoic acid (DHA)               | 4661129    | 834761  | 9092925    | 3432787 | 4266118  | 978065  | 8943819  | 3154369 | 0.01863                  | 2.08      | 0.94440                | -0.05     |
| Glutamate                                | 16374399   | 588848  | 15240980   | 704693  | 16218731 | 574918  | 15343940 | 1128295 | 0.02014                  | -1.75     | 0.86605                | 0.11      |
| acylcarnitine 16:0                       | 1687587    | 815916  | 3510659    | 1238967 | 1786085  | 483474  | 1903706  | 541180  | 0.02055                  | 1.77      | 0.02399                | -1.81     |

| Compound                           | Control CL |         | Control PI |         | HX600 CL |         | HX600 PI |         | Control CL vs Control PI |           | HX600 PI vs Control PI |           |
|------------------------------------|------------|---------|------------|---------|----------|---------|----------|---------|--------------------------|-----------|------------------------|-----------|
|                                    | Mean       | SD      | Mean       | SD      | Mean     | SD      | Mean     | SD      | p-value                  | Cohen's d | p-value                | Cohen's d |
| Adenosine 5'-diphosphoribose       | 43851      | 9785    | 58312      | 6603    | 40917    | 9175    | 36112    | 4631    | 0.02085                  | 1.76      | 0.00011                | -3.95     |
| Acylcarnitine 18:1                 | 1570946    | 687131  | 2924529    | 866657  | 1521428  | 315268  | 1902479  | 397090  | 0.02095                  | 1.74      | 0.03749                | -1.62     |
| N-acetylgarginine                  | 73469      | 10283   | 90312      | 9254    | 71470    | 5605    | 95357    | 23281   | 0.02147                  | 1.72      | 0.66208                | 0.31      |
| Acylcarnitine 20:1                 | 47106      | 28798   | 119533     | 52578   | 49715    | 16057   | 65826    | 16594   | 0.02225                  | 1.78      | 0.05441                | -1.55     |
| LysoPE 18:1                        | 368566     | 91732   | 580337     | 158613  | 369377   | 126299  | 414086   | 95970   | 0.02721                  | 1.69      | 0.07275                | -1.31     |
| Guanosine                          | 269882     | 48082   | 206342     | 26710   | 208725   | 21573   | 178587   | 39441   | 0.02727                  | -1.70     | 0.22182                | -0.84     |
| N-Acetylneuraminate                | 533745     | 67721   | 436465     | 52724   | 477058   | 73630   | 479626   | 37216   | 0.02964                  | -1.62     | 0.16567                | 0.96      |
| Docosatetraenoic acid              | 366711     | 101436  | 913068     | 486881  | 352253   | 129943  | 846930   | 385818  | 0.03388                  | 1.86      | 0.81664                | -0.15     |
| LysoPC 18:0                        | 3240252    | 1210122 | 7260571    | 3480025 | 4265381  | 1697418 | 3574995  | 1301207 | 0.03485                  | 1.71      | 0.05085                | -1.54     |
| PE 38:6                            | 1323219    | 832676  | 381160     | 272432  | 785191   | 885796  | 606912   | 462129  | 0.03704                  | -1.70     | 0.36888                | 0.61      |
| Plasmenyl-PC 37:1; PC(P-15:0/22:1) | 2689888    | 1715810 | 808182     | 595876  | 1720055  | 2080563 | 1278705  | 1051368 | 0.04303                  | -1.63     | 0.40438                | 0.57      |
| PE 36:4; PE(18:2/18:2)             | 377086     | 241426  | 114972     | 78978   | 236444   | 268816  | 186039   | 143527  | 0.04370                  | -1.64     | 0.35491                | 0.64      |
| Plasmenyl-PE 38:6; PE(P-16:0/22:6) | 1538909    | 1078756 | 379243     | 347532  | 917401   | 1247135 | 681264   | 564171  | 0.04517                  | -1.63     | 0.33213                | 0.66      |
| LysoPE 16:0                        | 289211     | 60645   | 393143     | 81587   | 277278   | 69950   | 285116   | 85788   | 0.04531                  | 1.46      | 0.06861                | -1.29     |
| LysoPE 22:4                        | 177250     | 37922   | 277695     | 91545   | 189557   | 106468  | 206406   | 60068   | 0.04684                  | 1.55      | 0.17610                | -0.94     |
| Plasmenyl-PE 36:4; PE(P-16:0/20:4) | 6817481    | 4922640 | 1469820    | 1951149 | 4682403  | 8449282 | 3242407  | 3254121 | 0.04751                  | -1.56     | 0.32078                | 0.68      |
| Plasmenyl-PC 39:3; PC(P-17:0/22:3) | 2151035    | 1393612 | 674757     | 460045  | 1531762  | 1749750 | 933998   | 800356  | 0.04824                  | -1.59     | 0.54412                | 0.41      |

Values from mode with largest abundance is shown. Legend: CL, contra lateral side; PI, ischemic side; p-value, p-value from Student's t-test; Cohen's d, Cohen's d effect size.
